# Supplementary material for: Tumour Stroma Ratio Assessment Using Digital Image Analysis Predicts Survival in Triple Negative and Luminal Breast Cancer
Source: PubMed Central journal article supplement (PMC7764351; doi:10.3390/cancers12123749), 2020-12-13
Supplement: cancers-12-03749-s001.pdf [file cancers-12-03749-s001.pdf]

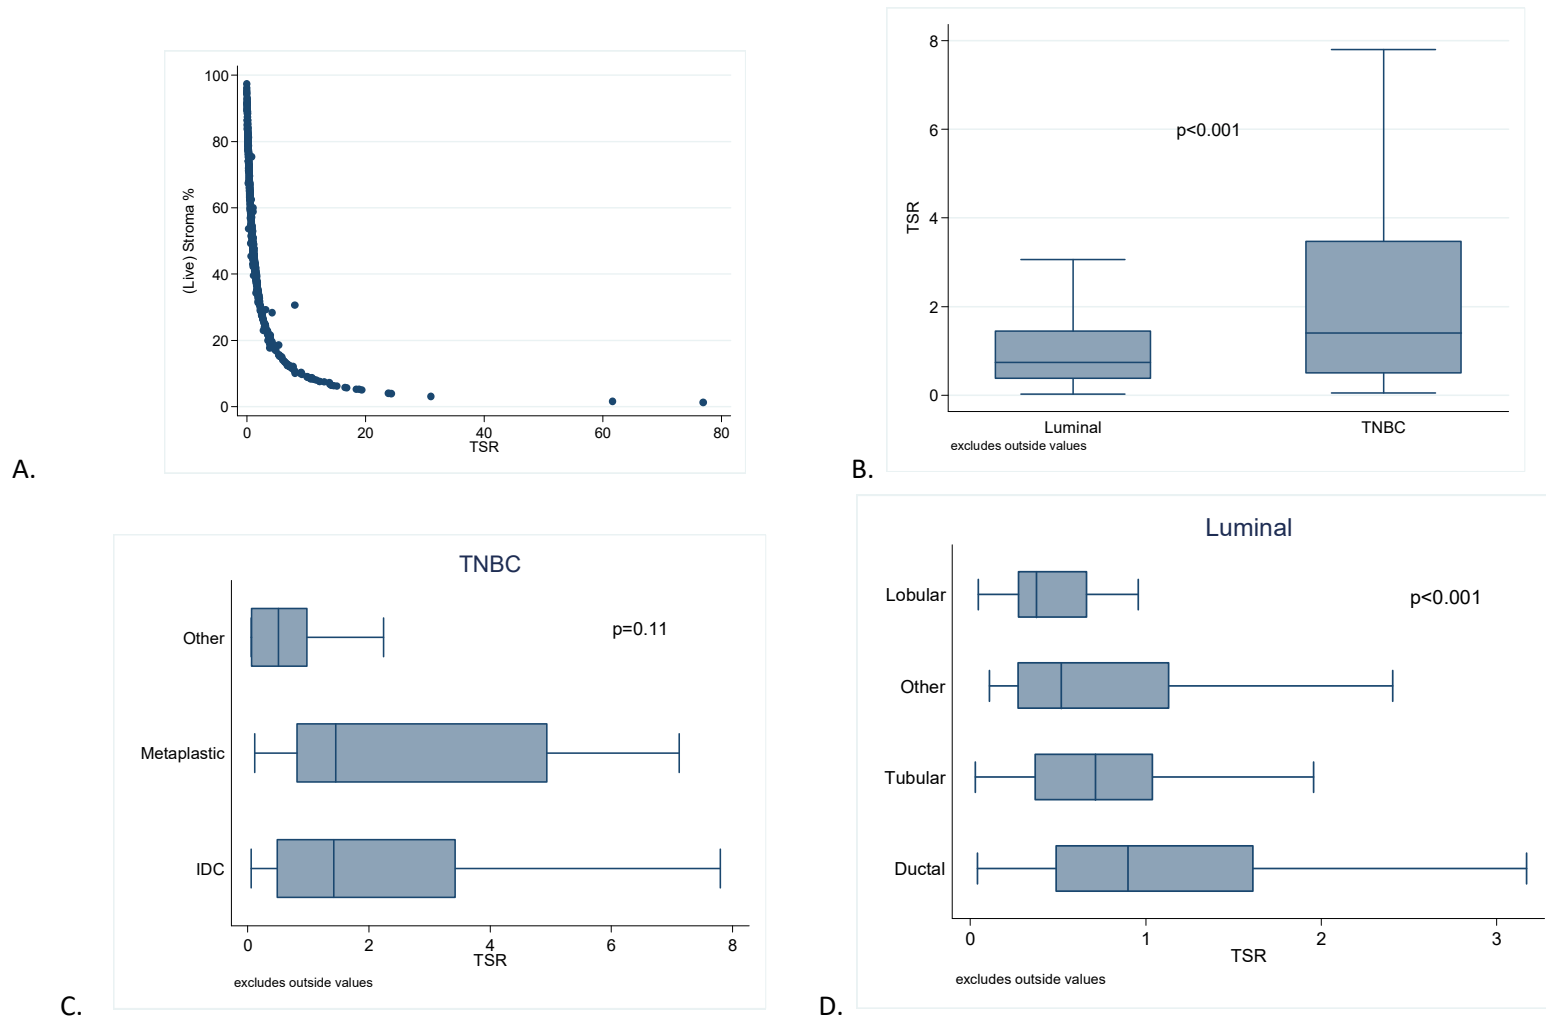

**Supplementary figure 1. The distribution of tumour stroma ratios within the study cohorts.** A: distribution of TSR scores versus stromal percentage for the whole cohort. B: Box plot to illustrate the distribution of TSR scores between luminal and TNBC. C: TSR scores for TNBC ; D: TSR scores for luminal histological types. (C: TNBC other includes apocrine, micropapillary; D: Luminal other: includes micropapillary, mixed, mucinous).

|                  | TNBC    |                |        |                           |                  |         |       | Luminal  |                   |         |                           |                  |        |        |
|------------------|---------|----------------|--------|---------------------------|------------------|---------|-------|----------|-------------------|---------|---------------------------|------------------|--------|--------|
|                  | Total   | TSR<br>(cut 2) |        | X <sup>2</sup><br>p value | TILs<br>(cut 30) |         |       | Total    | TSR<br>(cut 0.74) |         | X <sup>2</sup><br>p value | TILs<br>Cut (10) |        |        |
|                  |         | low            | high   |                           | low              | high    |       |          | low               | high    |                           | low              | high   |        |
| <b>Age</b>       |         |                |        |                           |                  |         |       |          |                   |         |                           |                  |        |        |
| ≤55              | 105(43) | 55(36)         | 50(54) | 7.5                       | 55(42)           | 50(45)  | 0.28  | 139 (34) | 60(30)            | 79(39)  | 4.1                       | 104(32)          | 35(44) | 4.61   |
| >55              | 138(57) | 96(64)         | 42(46) | 0.006                     | 77(58)           | 61(55)  | 0.596 | 264(66)  | 142(70)           | 122(61) | 0.043                     | 221(68)          | 43(55) | 0.032  |
| <b>Size</b>      |         |                |        |                           |                  |         |       |          |                   |         |                           |                  |        |        |
| ≤20mm            | 113(47) | 69(46)         | 44(48) | 0.08                      | 58(44)           | 55(50)  | 0.67  | 294(73)  | 158(78)           | 136(68) | 5.3                       | 237(73)          | 57(74) | 0.04   |
| >20mm            | 129(53) | 81(54)         | 48(52) | 0.782                     | 73(56)           | 56(50)  | 0.412 | 108(27)  | 44(22)            | 64(32)  | 0.021                     | 88(27)           | 20(26) | 0.844  |
| <b>Grade</b>     |         |                |        |                           |                  |         |       |          |                   |         |                           |                  |        |        |
| 1 & 2            | 12(5)   | 10(7)          | 2(2)   | 2.46                      | 11(8)            | 1(1)    | 7.03  | 321(80)  | 179(89)           | 142(71) | 18.7                      | 273(84)          | 48(62) | 18.7   |
| 3                | 232(95) | 141(93)        | 91(98) | 0.117                     | 122(92)          | 110(99) | 0.008 | 80(20)   | 23(11)            | 57(29)  | <0.001                    | 51(16)           | 29(38) | <0.001 |
| <b>LN status</b> |         |                |        |                           |                  |         |       |          |                   |         |                           |                  |        |        |
| Neg              | 156(65) | 94(63)         | 62(68) | 0.74                      | 87(66)           | 69(63)  | 0.35  | 282(70)  | 151(75)           | 131(65) | 4.4                       | 228(70)          | 54(69) | 0.03   |
| Pos              | 85(35)  | 56(37)         | 29(32) | 0.389                     | 44(34)           | 41(37)  | 0.551 | 121(30)  | 51(25)            | 70(35)  | 0.036                     | 97(30)           | 24(31) | 0.873  |
| <b>TILs (*)</b>  |         |                |        |                           |                  |         |       |          |                   |         |                           |                  |        |        |
| ≤30/ ≤10         | 133(55) | 92(61)         | 41(44) | 6.58                      |                  |         |       | 325(81)  | 180(89)           | 145(72) | 18.59                     |                  |        |        |
| >30/ >10         | 111(45) | 59(39)         | 52(56) | 0.010                     |                  |         |       | 78(19)   | 22(11)            | 56(28)  | <0.001                    |                  |        |        |
| <b>Hist type</b> |         |                |        |                           |                  |         |       |          |                   |         |                           |                  |        |        |
| Ductal           | 221(91) | 136(90)        | 85(91) | 1.25                      | 114(86)          | 107(96) | 9.08  |          |                   |         |                           |                  |        |        |
| Meta             | 17(7)   | 10(7)          | 7(8)   | 0.536                     | 13(10)           | 4(4)    | 0.011 |          |                   |         |                           |                  |        |        |
| Other            | 6(2)    | 5(3)           | 1(1)   |                           | 6(4)             | 0(0)    |       |          |                   |         |                           |                  |        |        |
| Ductal           |         |                |        |                           |                  |         |       | 286(71)  | 123(61)           | 163(81) | 23.88                     | 219(67)          | 67(86) | 10.5   |
| Lobular          |         |                |        |                           |                  |         |       | 31(8)    | 25(12)            | 6(3)    | <0.001                    | 28(9)            | 3(4)   | 0.015  |
| Tubular          |         |                |        |                           |                  |         |       | 29(7)    | 16(8)             | 13(7)   |                           | 26(8)            | 3(4)   |        |
| Other            |         |                |        |                           |                  |         |       | 57(14)   | 38(19)            | 19(9)   |                           | 52(16)           | 5(6)   |        |

**Supplementary table 1.** Association of tumour stroma ratio (TSR) with clinico-pathological variables using the X<sup>2</sup> test.\*TILs cut point ≤30% for TNBC and ≤10% for luminal. Meta: metaplastic carcinoma.

| <b>Overall Survival</b>                |            | <b>Univariate</b> |              |          | <b>Multivariable<br/>(n=238, events n= 66)</b> |              |          |
|----------------------------------------|------------|-------------------|--------------|----------|------------------------------------------------|--------------|----------|
| <b>Variables</b>                       |            | <b>HR</b>         | <b>95%CI</b> | <b>p</b> | <b>HR</b>                                      | <b>95%CI</b> | <b>p</b> |
| TSR/TILS 4 group<br>(vs low/low)       |            |                   |              |          |                                                |              |          |
| low/high                               | 59 vs 92   | 0.53              | 0.29 - 0.99  | 0.047    | 0.61                                           | 0.32 – 1.14  | 0.119    |
| high/low                               | 41 vs 92   | 0.56              | 0.28 – 1.13  | 0.107    | 0.44                                           | 0.18 – 1.06  | 0.067    |
| high/high                              | 52 vs 92   | 0.49              | 0.25 – 0.94  | 0.033    | 0.45                                           | 0.23 – 0.87  | 0.018    |
| Age ≤55 vs >55                         | 105 vs 138 | 0.48              | 0.29 – 0.80  | 0.004    | 0.42                                           | 0.25 – 0.72  | 0.001    |
| Size ≤20 vs >20                        | 113 vs 129 | 0.54              | 0.33 – 0.89  | 0.016    | 0.53                                           | 0.31 – 0.90  | 0.019    |
| Grade 1,2 vs 3                         | 12 vs 232  | 1.46              | 0.63 – 3.38  | 0.379    |                                                |              |          |
| LN neg vs pos                          | 156 vs 85  | 0.43              | 0.27 – 0.70  | 0.001    | 0.47                                           | 0.28 – 0.79  | 0.004    |
| Chemo yes vs no                        | 174 vs 58  | 0.49              | 0.30 – 0.81  | 0.006    |                                                |              |          |
| <b>Breast Cancer Specific Survival</b> |            | <b>Univariate</b> |              |          | <b>Multivariable<br/>(n=238, events n= 46)</b> |              |          |
| <b>Variables</b>                       | <b>n</b>   | <b>HR</b>         | <b>95%CI</b> | <b>p</b> | <b>HR</b>                                      | <b>95%CI</b> | <b>p</b> |
| TSR/TILS 4 group<br>(vs low/low)       |            |                   |              |          |                                                |              |          |
| low/high                               | 59 vs 92   | 0.45              | 0.21 – 0.95  | 0.036    | 0.53                                           | 0.25 – 1.13  | 0.098    |
| high/low                               | 41 vs 92   | 0.29              | 0.10 – 0.82  | 0.019    | 0.31                                           | 0.09 – 1.04  | 0.057    |
| high/high                              | 52 vs 92   | 0.36              | 0.16 – 0.82  | 0.016    | 0.31                                           | 0.13 – 0.72  | 0.006    |
| Age ≤55 vs >55                         | 105 vs 138 | 0.50              | 0.27 – 0.91  | 0.022    | 0.44                                           | 0.23 – 0.83  | 0.012    |
| Size ≤20 vs >20                        | 113 vs 129 | 0.45              | 0.24 – 0.85  | 0.013    | 0.48                                           | 0.25 – 0.94  | 0.031    |
| Grade 1,2 vs 3                         | 12 vs 232  | 1.48              | 0.53 – 4.14  | 0.453    |                                                |              |          |
| LN neg vs pos                          | 156 vs 85  | 0.31              | 0.17 – 0.55  | <0.001   | 0.33                                           | 0.18 – 0.62  | 0.001    |
| Chemo yes vs no                        | 174 vs 58  | 0.69              | 0.37 – 1.30  | 0.253    |                                                |              |          |

**Supplementary Table 2.** Univariate and multivariate analysis for OS and BCSS in TNBC.

Abbreviations: n, sample number; HR, hazard ratio; CI, confidence interval; p, probability value).
